# Supplementary material
Source: PubMed Central journal article supplement (PMC3836605)
Supplement: NIHMS159776-supplement-Supplementary_Table_S1.pdf [file NIHMS159776-supplement-Supplementary_Table_S1.pdf]

SUPPLEMENTARY MATERIAL FOR:

## Assays for the rapid and specific identification of North American *Yersinia pestis* and the common laboratory strain CO92

Amy J. Vogler<sup>1</sup>, Elizabeth M. Driebe<sup>1</sup>, Judy Lee<sup>1</sup>, Raymond K. Auerbach<sup>1</sup>, Christopher J. Allender<sup>1</sup>, Miles Stanley<sup>1</sup>, Kristy Kubota<sup>2</sup>, Gary L. Andersen<sup>3</sup>, Lyndsay Radnedge<sup>4</sup>, Patricia L. Worsham<sup>5</sup>, Paul Keim<sup>1</sup>, and David M. Wagner<sup>1</sup>

<sup>1</sup>Department of Biological Sciences, Northern Arizona University, Flagstaff, AZ, <sup>2</sup>Centers for Disease Control and Prevention, Fort Collins, CO, <sup>3</sup>Lawrence Berkeley National Laboratory, Berkeley, CA, <sup>4</sup>Lawrence Livermore National Laboratory, Livermore, CA, and <sup>5</sup>United States Army Medical Research Institute of Infectious Diseases, Fort Detrick, Frederick, MD, USA

BioTechniques 44:201-207 (February 2008)

Supplementary Table S1. DNAs Used to Validate SNP Assays

| Isolate      | Panel <sup>a</sup> | Species <sup>b</sup> | Branch <sup>c</sup> | State,Country | NA <sup>d</sup> | NA <sup>d</sup> Call | CO92 | CO92 Call | Source Lab <sup>e</sup> |
|--------------|--------------------|----------------------|---------------------|---------------|-----------------|----------------------|------|-----------|-------------------------|
| IP32934      | WW                 | <i>Ypst</i>          | -                   | France        | no              | -(G)                 | no   | -(A)      | IP                      |
| IP32949      | WW                 | <i>Ypst</i>          | -                   | France        | no              | -(G)                 | no   | -(A)      | IP                      |
| IP32951      | WW                 | <i>Ypst</i>          | -                   | France        | no              | -(G)                 | no   | -(A)      | IP                      |
| IP32953      | WW                 | <i>Ypst</i>          | -                   | France        | no              | -(G)                 | no   | -(A)      | IP                      |
| IP32790      | WW                 | <i>Ypst</i>          | -                   | Italy         | no              | -(G)                 | no   | -(A)      | IP                      |
| IP32817      | WW                 | <i>Ypst</i>          | -                   | Japan         | no              | -(G)                 | no   | -(A)      | IP                      |
| IP32889      | WW                 | <i>Ypst</i>          | -                   | Spain         | no              | -(G)                 | no   | -(A)      | IP                      |
| IP31830      | WW                 | <i>Ypst</i>          | -                   | UK            | no              | -(G)                 | no   | -(A)      | IP                      |
| IP31833      | WW                 | <i>Ypst</i>          | -                   | UK            | no              | -(G)                 | no   | -(A)      | IP                      |
| Pestoides A  | WW                 | <i>Yp</i>            | 0.PE1               | USSR          | no              | -(G)                 | no   | -(A)      | USAMRIID                |
| Pestoides B  | WW                 | <i>Yp</i>            | 0.PE1               | USSR          | no              | -(G)                 | no   | -(A)      | USAMRIID                |
| Pestoides C  | WW                 | <i>Yp</i>            | 0.PE1               | USSR          | no              | -(G)                 | no   | -(A)      | USAMRIID                |
| Pestoides D  | WW                 | <i>Yp</i>            | 0.PE1               | USSR          | no              | -(G)                 | no   | -(A)      | USAMRIID                |
| Pestoides E  | WW                 | <i>Yp</i>            | 0.PE2               | USSR          | no              | -(G)                 | no   | -(A)      | USAMRIID                |
| Pestoides F  | WW                 | <i>Yp</i>            | 0.PE2               | USSR          | no              | -(G)                 | no   | -(A)      | USAMRIID                |
| Pestoides G  | WW                 | <i>Yp</i>            | 0.PE2               | USSR          | no              | -(G)                 | no   | -(A)      | USAMRIID                |
| Angola       | WW                 | <i>Yp</i>            | 0.PE3               | Angola        | no              | -(G)                 | no   | -(A)      | USAMRIID                |
| IP516        | WW                 | <i>Yp</i>            | 2.MED               | Kurdistan     | no              | -(G)                 | no   | -(A)      | IP                      |
| Kim 10       | WW                 | <i>Yp</i>            | 2.MED               | Kurdistan     | no              | -(G)                 | no   | -(A)      | USAMRIID                |
| Pestoides J  | WW                 | <i>Yp</i>            | 2.MED               | USSR          | no              | -(G)                 | no   | -(A)      | USAMRIID                |
| PyH1R3       | WW                 | <i>Yp</i>            | 2.MED               | unknown       | no              | -(G)                 | no   | -(A)      | CDC                     |
| Harbin 35    | WW                 | <i>Yp</i>            | 2.ANT               | China         | no              | -(G)                 | no   | -(A)      | USAMRIID                |
| Nicholisk 41 | WW                 | <i>Yp</i>            | 2.ANT               | China         | no              | -(G)                 | no   | -(A)      | USAMRIID                |
| IP611        | WW                 | <i>Yp</i>            | 2.ANT               | Japan         | no              | -(G)                 | no   | -(A)      | IP                      |
| IP546        | WW                 | <i>Yp</i>            | 2.ANT               | Nepal         | no              | -(G)                 | no   | -(A)      | IP                      |
| Nepal 516    | WW                 | <i>Yp</i>            | 2.ANT               | Nepal         | no              | -(G)                 | no   | -(A)      | LLNL                    |
| IP541        | WW                 | <i>Yp</i>            | 2.ANT               | USSR          | no              | -(G)                 | no   | -(A)      | IP                      |
| Antiqua      | WW                 | <i>Yp</i>            | 1.ANT               | Congo         | no              | -(G)                 | no   | -(A)      | LLNL                    |
| IP537        | WW                 | <i>Yp</i>            | 1.ANT               | Kenya         | no              | -(G)                 | no   | -(A)      | IP                      |

## Benchmarks

| Isolate         | Panel <sup>a</sup> | Species <sup>b</sup> | Branch <sup>c</sup> | State, Country | NA <sup>d</sup> | NA <sup>d</sup> Call | CO92 | CO92 Call | Source Lab <sup>e</sup> |
|-----------------|--------------------|----------------------|---------------------|----------------|-----------------|----------------------|------|-----------|-------------------------|
| IP677           | WW                 | <i>Yp</i>            | 1.ANT               | Kenya          | no              | - (G)                | no   | - (A)     | IP                      |
| Nairobi         | WW                 | <i>Yp</i>            | 1.ANT               | Kenya          | no              | - (G)                | no   | - (A)     | USAMRIID                |
| La Paz          | WW                 | <i>Yp</i>            | 1.ORI               | Bolivia        | no              | - (G)                | no   | - (A)     | USAMRIID                |
| PexU2           | WW                 | <i>Yp</i>            | 1.ORI               | Brazil         | no              | - (G)                | no   | - (A)     | CDC                     |
| IP567           | WW                 | <i>Yp</i>            | 1.ORI               | Brazil         | no              | - (G)                | no   | - (A)     | IP                      |
| IP568           | WW                 | <i>Yp</i>            | 1.ORI               | Brazil         | no              | - (G)                | no   | - (A)     | IP                      |
| IP612           | WW                 | <i>Yp</i>            | 1.ORI               | Burma          | no              | - (G)                | no   | - (A)     | IP                      |
| CH97-1662       | WW                 | <i>Yp</i>            | 1.ORI               | China          | no              | - (G)                | no   | - (A)     | CDC                     |
| Nich 51         | WW                 | <i>Yp</i>            | 1.ORI               | China          | no              | - (G)                | no   | - (A)     | USAMRIID                |
| IP695           | WW                 | <i>Yp</i>            | 1.ORI               | Germany        | no              | - (G)                | no   | - (A)     | IP                      |
| IP696           | WW                 | <i>Yp</i>            | 1.ORI               | Germany        | no              | - (G)                | no   | - (A)     | IP                      |
| 195/P           | WW                 | <i>Yp</i>            | 1.ORI               | India          | no              | - (G)                | no   | - (A)     | CDC                     |
| PB6             | WW                 | <i>Yp</i>            | 1.ORI               | India          | no              | - (G)                | no   | - (A)     | CDC                     |
| Indian Isolate  | WW                 | <i>Yp</i>            | 1.ORI               | India          | no              | - (G)                | no   | - (A)     | USAMRIID                |
| Java 9          | WW                 | <i>Yp</i>            | 1.ORI               | Indonesia      | no              | - (G)                | no   | - (A)     | USAMRIID                |
| 12/39           | WW                 | <i>Yp</i>            | 1.ORI               | Madagascar     | no              | - (G)                | no   | - (A)     | IP Madagascar           |
| 10/92           | WW                 | <i>Yp</i>            | 1.ORI               | Madagascar     | no              | - (G)                | no   | - (A)     | IP Madagascar           |
| 261/00S         | WW                 | <i>Yp</i>            | 1.ORI               | Madagascar     | no              | - (G)                | no   | - (A)     | IP Madagascar           |
| 31/93           | WW                 | <i>Yp</i>            | 1.ORI               | Madagascar     | no              | - (G)                | no   | - (A)     | IP Madagascar           |
| 4/99B-80        | WW                 | <i>Yp</i>            | 1.ORI               | Madagascar     | no              | - (G)                | no   | - (A)     | IP Madagascar           |
| 52/91           | WW                 | <i>Yp</i>            | 1.ORI               | Madagascar     | no              | - (G)                | no   | - (A)     | IP Madagascar           |
| EV76            | WW                 | <i>Yp</i>            | 1.ORI               | Madagascar     | no              | - (G)                | no   | - (A)     | USAMRIID                |
| Russian Vaccine | WW                 | <i>Yp</i>            | 1.ORI               | Madagascar     | no              | - (G)                | no   | - (A)     | USAMRIID                |
| F361-66         | WW                 | <i>Yp</i>            | 1.ORI               | Nambia         | no              | - (G)                | no   | - (A)     | CDC                     |
| IP523           | WW                 | <i>Yp</i>            | 1.ORI               | Senegal        | no              | - (G)                | no   | - (A)     | IP                      |
| IP524           | WW                 | <i>Yp</i>            | 1.ORI               | Senegal        | no              | - (G)                | no   | - (A)     | IP                      |
| IP1535          | WW                 | <i>Yp</i>            | 1.ORI               | South Africa   | no              | - (G)                | no   | - (A)     | IP                      |
| IP521           | WW                 | <i>Yp</i>            | 1.ORI               | Turkey         | no              | - (G)                | no   | - (A)     | IP                      |
| Stravopol       | WW                 | <i>Yp</i>            | 1.ORI               | USSR           | no              | - (G)                | no   | - (A)     | USAMRIID                |
| IP820           | WW                 | <i>Yp</i>            | 1.ORI               | Vietnam        | no              | - (G)                | no   | - (A)     | IP                      |
| IP940           | WW                 | <i>Yp</i>            | 1.ORI               | Vietnam        | no              | - (G)                | no   | - (A)     | IP                      |
| 75-1833 F       | CO92               | <i>Yp</i>            | 1.ORI               | AZ, USA        | yes             | + (A)                | no   | - (A)     | CDC                     |
| 77NAV651F       | CO92               | <i>Yp</i>            | 1.ORI               | AZ, USA        | yes             | + (A)                | no   | - (A)     | CDC                     |
| 77NAV652A       | CO92               | <i>Yp</i>            | 1.ORI               | AZ, USA        | yes             | + (A)                | no   | - (A)     | CDC                     |
| 77NAV652B       | CO92               | <i>Yp</i>            | 1.ORI               | AZ, USA        | yes             | + (A)                | no   | - (A)     | CDC                     |
| 77NAV654        | CO92               | <i>Yp</i>            | 1.ORI               | AZ, USA        | yes             | + (A)                | no   | - (A)     | CDC                     |
| AZ83-0208       | WW                 | <i>Yp</i>            | 1.ORI               | AZ, USA        | yes             | + (A)                | no   | - (A)     | CDC                     |
| AZ88-5040       | WW                 | <i>Yp</i>            | 1.ORI               | AZ, USA        | yes             | + (A)                | no   | - (A)     | CDC                     |
| AZ92-1347       | CO92               | <i>Yp</i>            | 1.ORI               | AZ, USA        | yes             | + (A)                | no   | - (A)     | CDC                     |
| AZ92-1384-337   | CO92               | <i>Yp</i>            | 1.ORI               | AZ, USA        | yes             | + (A)                | no   | - (A)     | CDC                     |

| Isolate                 | Panel <sup>a</sup> | Species <sup>b</sup> | Branch <sup>c</sup> | State, Country | NA <sup>d</sup> | NA <sup>d</sup> Call | CO92 | CO92 Call | Source Lab <sup>e</sup> |
|-------------------------|--------------------|----------------------|---------------------|----------------|-----------------|----------------------|------|-----------|-------------------------|
| AZ92-1387               | CO92               | <i>Yp</i>            | 1.ORI               | AZ, USA        | yes             | + (A)                | no   | - (A)     | CDC                     |
| IJ84-1188-754           | CO92               | <i>Yp</i>            | 1.ORI               | AZ, USA        | yes             | + (A)                | no   | - (A)     | CDC                     |
| FV-1                    | WW                 | <i>Yp</i>            | 1.ORI               | AZ, USA        | yes             | + (A)                | no   | - (A)     | NAU                     |
| A1122                   | WW                 | <i>Yp</i>            | 1.ORI               | CA, USA        | yes             | + (A)                | no   | - (A)     | CDC                     |
| 88A4125                 | WW                 | <i>Yp</i>            | 1.ORI               | CA, USA        | yes             | + (A)                | no   | - (A)     | CDHS                    |
| 90A4021                 | WW                 | <i>Yp</i>            | 1.ORI               | CA, USA        | yes             | + (A)                | no   | - (A)     | CDHS                    |
| 92A4261                 | WW                 | <i>Yp</i>            | 1.ORI               | CA, USA        | yes             | + (A)                | no   | - (A)     | CDHS                    |
| 94A4772                 | WW                 | <i>Yp</i>            | 1.ORI               | CA, USA        | yes             | + (A)                | no   | - (A)     | CDHS                    |
| 97A7970                 | WW                 | <i>Yp</i>            | 1.ORI               | CA, USA        | yes             | + (A)                | no   | - (A)     | CDHS                    |
| CO96-2369               | WW                 | <i>Yp</i>            | 1.ORI               | CO, USA        | yes             | + (A)                | no   | - (A)     | CDC                     |
| CO96-2596-593           | CO92               | <i>Yp</i>            | 1.ORI               | CO, USA        | yes             | + (A)                | no   | - (A)     | CDC                     |
| 242                     | CO92               | <i>Yp</i>            | 1.ORI               | CO, USA        | yes             | + (A)                | no   | - (A)     | USAMRIID                |
| South Park              | CO92               | <i>Yp</i>            | 1.ORI               | CO, USA        | yes             | + (A)                | no   | - (A)     | USAMRIID                |
| ID97-1336               | WW                 | <i>Yp</i>            | 1.ORI               | ID, USA        | yes             | + (A)                | no   | - (A)     | CDC                     |
| KS97-2097-357 mp        | WW                 | <i>Yp</i>            | 1.ORI               | KS, USA        | yes             | + (A)                | no   | - (A)     | CDC                     |
| MT874899 mp             | WW                 | <i>Yp</i>            | 1.ORI               | MT, USA        | yes             | + (A)                | no   | - (A)     | CDC                     |
| ND864487-680 mp         | WW                 | <i>Yp</i>            | 1.ORI               | ND, USA        | yes             | + (A)                | no   | - (A)     | CDC                     |
| NM84-0082               | CO92               | <i>Yp</i>            | 1.ORI               | NM, USA        | yes             | + (A)                | no   | - (A)     | CDC                     |
| 9808723                 | WW                 | <i>Yp</i>            | 1.ORI               | NM, USA        | yes             | + (A)                | no   | - (A)     | NMDH                    |
| 9808730                 | WW                 | <i>Yp</i>            | 1.ORI               | NM, USA        | yes             | + (A)                | no   | - (A)     | NMDH                    |
| 80WE278                 | WW                 | <i>Yp</i>            | 1.ORI               | NV, USA        | yes             | + (A)                | no   | - (A)     | CDC                     |
| OR820328                | WW                 | <i>Yp</i>            | 1.ORI               | OR, USA        | yes             | + (A)                | no   | - (A)     | CDC                     |
| BE4-977                 | WW                 | <i>Yp</i>            | 1.ORI               | TX, USA        | yes             | + (A)                | no   | - (A)     | TDSHS                   |
| UT00-3398-626 mp        | WW                 | <i>Yp</i>            | 1.ORI               | UT, USA        | yes             | + (A)                | no   | - (A)     | CDC                     |
| WA84-0056               | WW                 | <i>Yp</i>            | 1.ORI               | WA, USA        | yes             | + (A)                | no   | - (A)     | CDC                     |
| 80WE249                 | WW                 | <i>Yp</i>            | 1.ORI               | WY, USA        | yes             | + (A)                | no   | - (A)     | CDC                     |
| CO92                    | WW, CO92           | <i>Yp</i>            | 1.ORI               | CO, USA        | yes             | + (A)                | yes  | + (C)     | USAMRIID                |
| CO92 #1097 <sup>f</sup> | CO92               | <i>Yp</i>            | 1.ORI               | CO, USA        | yes             | + (A)                | yes  | + (C)     | USAMRIID                |
| CO92 #1098 <sup>f</sup> | CO92               | <i>Yp</i>            | 1.ORI               | CO, USA        | yes             | + (A)                | yes  | + (C)     | USAMRIID                |
| CO92 #1099 <sup>f</sup> | CO92               | <i>Yp</i>            | 1.ORI               | CO, USA        | yes             | + (A)                | yes  | + (C)     | USAMRIID                |
| CO92 #1100 <sup>f</sup> | CO92               | <i>Yp</i>            | 1.ORI               | CO, USA        | yes             | + (A)                | yes  | + (C)     | USAMRIID                |
| CO92 #1101 <sup>f</sup> | CO92               | <i>Yp</i>            | 1.ORI               | CO, USA        | yes             | + (A)                | yes  | + (C)     | USAMRIID                |
| CO92 #1102 <sup>f</sup> | CO92               | <i>Yp</i>            | 1.ORI               | CO, USA        | yes             | + (A)                | yes  | + (C)     | USAMRIID                |
| CO92 #1103 <sup>f</sup> | CO92               | <i>Yp</i>            | 1.ORI               | CO, USA        | yes             | + (A)                | yes  | + (C)     | USAMRIID                |
| CO92 #1104 <sup>f</sup> | CO92               | <i>Yp</i>            | 1.ORI               | CO, USA        | yes             | + (A)                | yes  | + (C)     | USAMRIID                |
| CO92 #1106 <sup>f</sup> | CO92               | <i>Yp</i>            | 1.ORI               | CO, USA        | yes             | + (A)                | yes  | + (C)     | USAMRIID                |
| CO92 #1107 <sup>f</sup> | CO92               | <i>Yp</i>            | 1.ORI               | CO, USA        | yes             | + (A)                | yes  | + (C)     | USAMRIID                |
| CO92 #1108 <sup>f</sup> | CO92               | <i>Yp</i>            | 1.ORI               | CO, USA        | yes             | + (A)                | yes  | + (C)     | USAMRIID                |

## Benchmarks

| Isolate                  | Panel <sup>a</sup> | Species <sup>b</sup> | Branch <sup>c</sup> | State, Country | NA <sup>d</sup> | NA <sup>d</sup> Call | CO92 | CO92 Call | Source Lab <sup>e</sup> |
|--------------------------|--------------------|----------------------|---------------------|----------------|-----------------|----------------------|------|-----------|-------------------------|
| CO92 #1109 <sup>f</sup>  | CO92               | <i>Yp</i>            | 1.ORI               | CO, USA        | yes             | + (A)                | yes  | + (C)     | USAMRIID                |
| CO92 #1110 <sup>f</sup>  | CO92               | <i>Yp</i>            | 1.ORI               | CO, USA        | yes             | + (A)                | yes  | + (C)     | USAMRIID                |
| CO92 lcr-                | CO92               | <i>Yp</i>            | 1.ORI               | CO, USA        | yes             | + (A)                | yes  | + (C)     | LLNL                    |
| CO92 lcr+                | CO92               | <i>Yp</i>            | 1.ORI               | CO, USA        | yes             | + (A)                | yes  | + (C)     | LLNL                    |
| CO99-3015 <sup>g</sup>   | CO92               | <i>Yp</i>            | 1.ORI               | CO, USA        | yes             | + (A)                | yes  | + (C)     | CDC                     |
| CO99-3016 <sup>h</sup>   | CO92               | <i>Yp</i>            | 1.ORI               | CO, USA        | yes             | + (A)                | yes  | + (C)     | CDC                     |
| CO99-3015mp <sup>g</sup> | CO92               | <i>Yp</i>            | 1.ORI               | CO, USA        | yes             | + (A)                | yes  | + (C)     | CDC                     |
| CO99-3016mp <sup>h</sup> | CO92               | <i>Yp</i>            | 1.ORI               | CO, USA        | yes             | + (A)                | yes  | + (C)     | CDC                     |

<sup>a</sup>Refers to the panel of DNAs an isolate was included in: either a worldwide (WW) diversity panel, or a CO92 panel consisting of CO92 isolates and CO92 genetic near neighbors

<sup>b</sup>*Yp*: *Y. pestis*; *Ypst*: *Y. pseudotuberculosis*

<sup>c</sup>Indicates the molecular group for the isolates as defined by 7

<sup>d</sup>NA: North America

<sup>e</sup>IP: Institut Pasteur; USAMRIID: U.S. Army Medical Research Institute of Infectious Diseases; LLNL: Lawrence Livermore National Laboratory; CDC: Centers for Disease Control and Prevention; IP Madagascar: Institut Pasteur de Madagascar; TDSHS: Texas Department of State Health Services; NMDH: New Mexico Department of Health; NAU: Northern Arizona University; CDHS: California Department of Health Services

<sup>f</sup>CO92 derivatives previously described by 22

<sup>g,h</sup>Indicates two sets of paired isolates consisting of the original isolate and the isolate after a mouse passage (mp)
